# Supplementary material for: A system-based analysis of the genetic determinism of udder conformation and health phenotypes across three French dairy cattle breeds
Source: PubMed Central journal article supplement (PMC6028091; doi:10.1371/journal.pone.0199931), 2018-07-02
Supplement: pone.0199931.s001.pdf [file pone.0199931.s001.pdf]

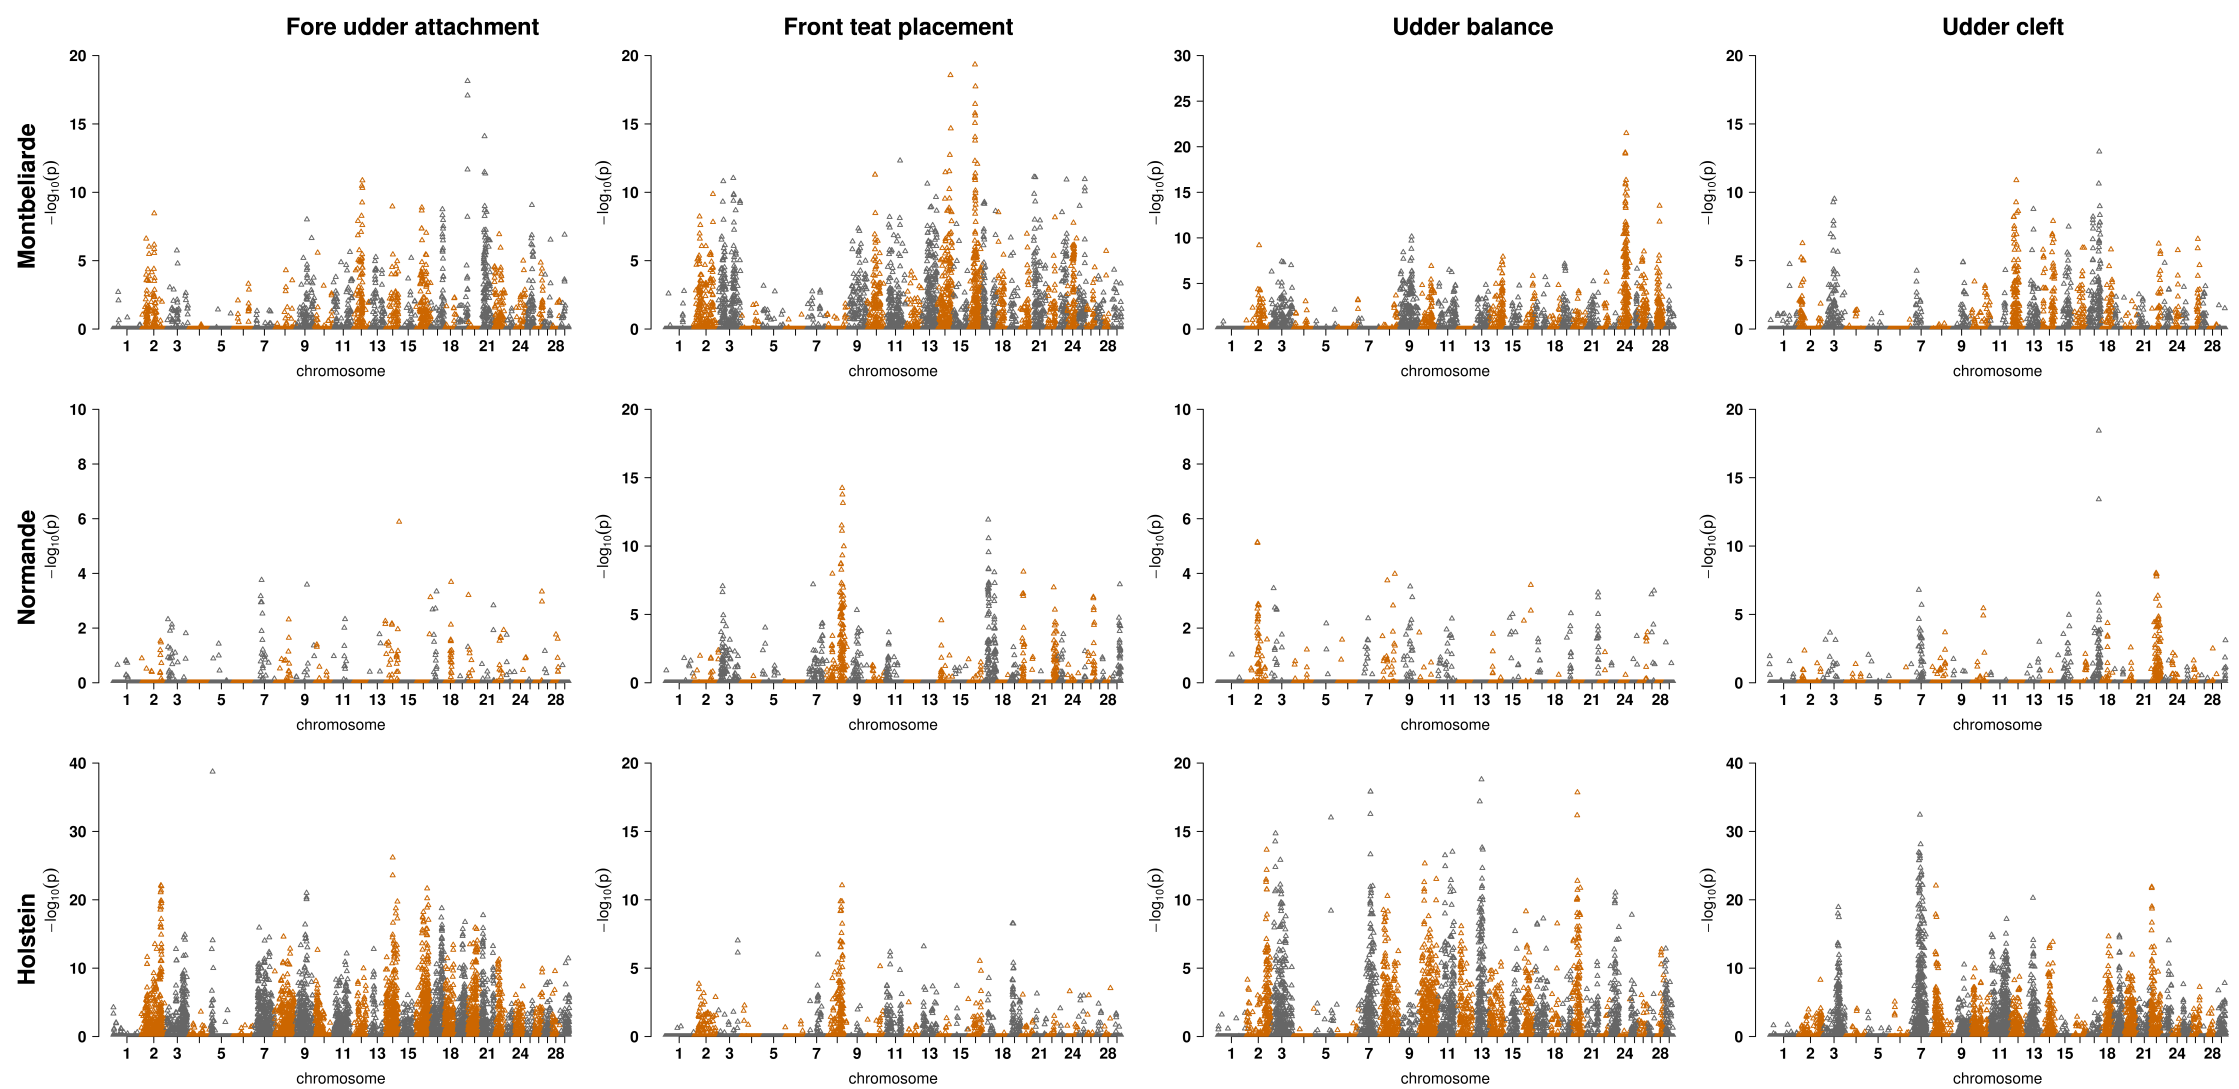

**Manhattan plots for udder traits in three French dairy breeds**

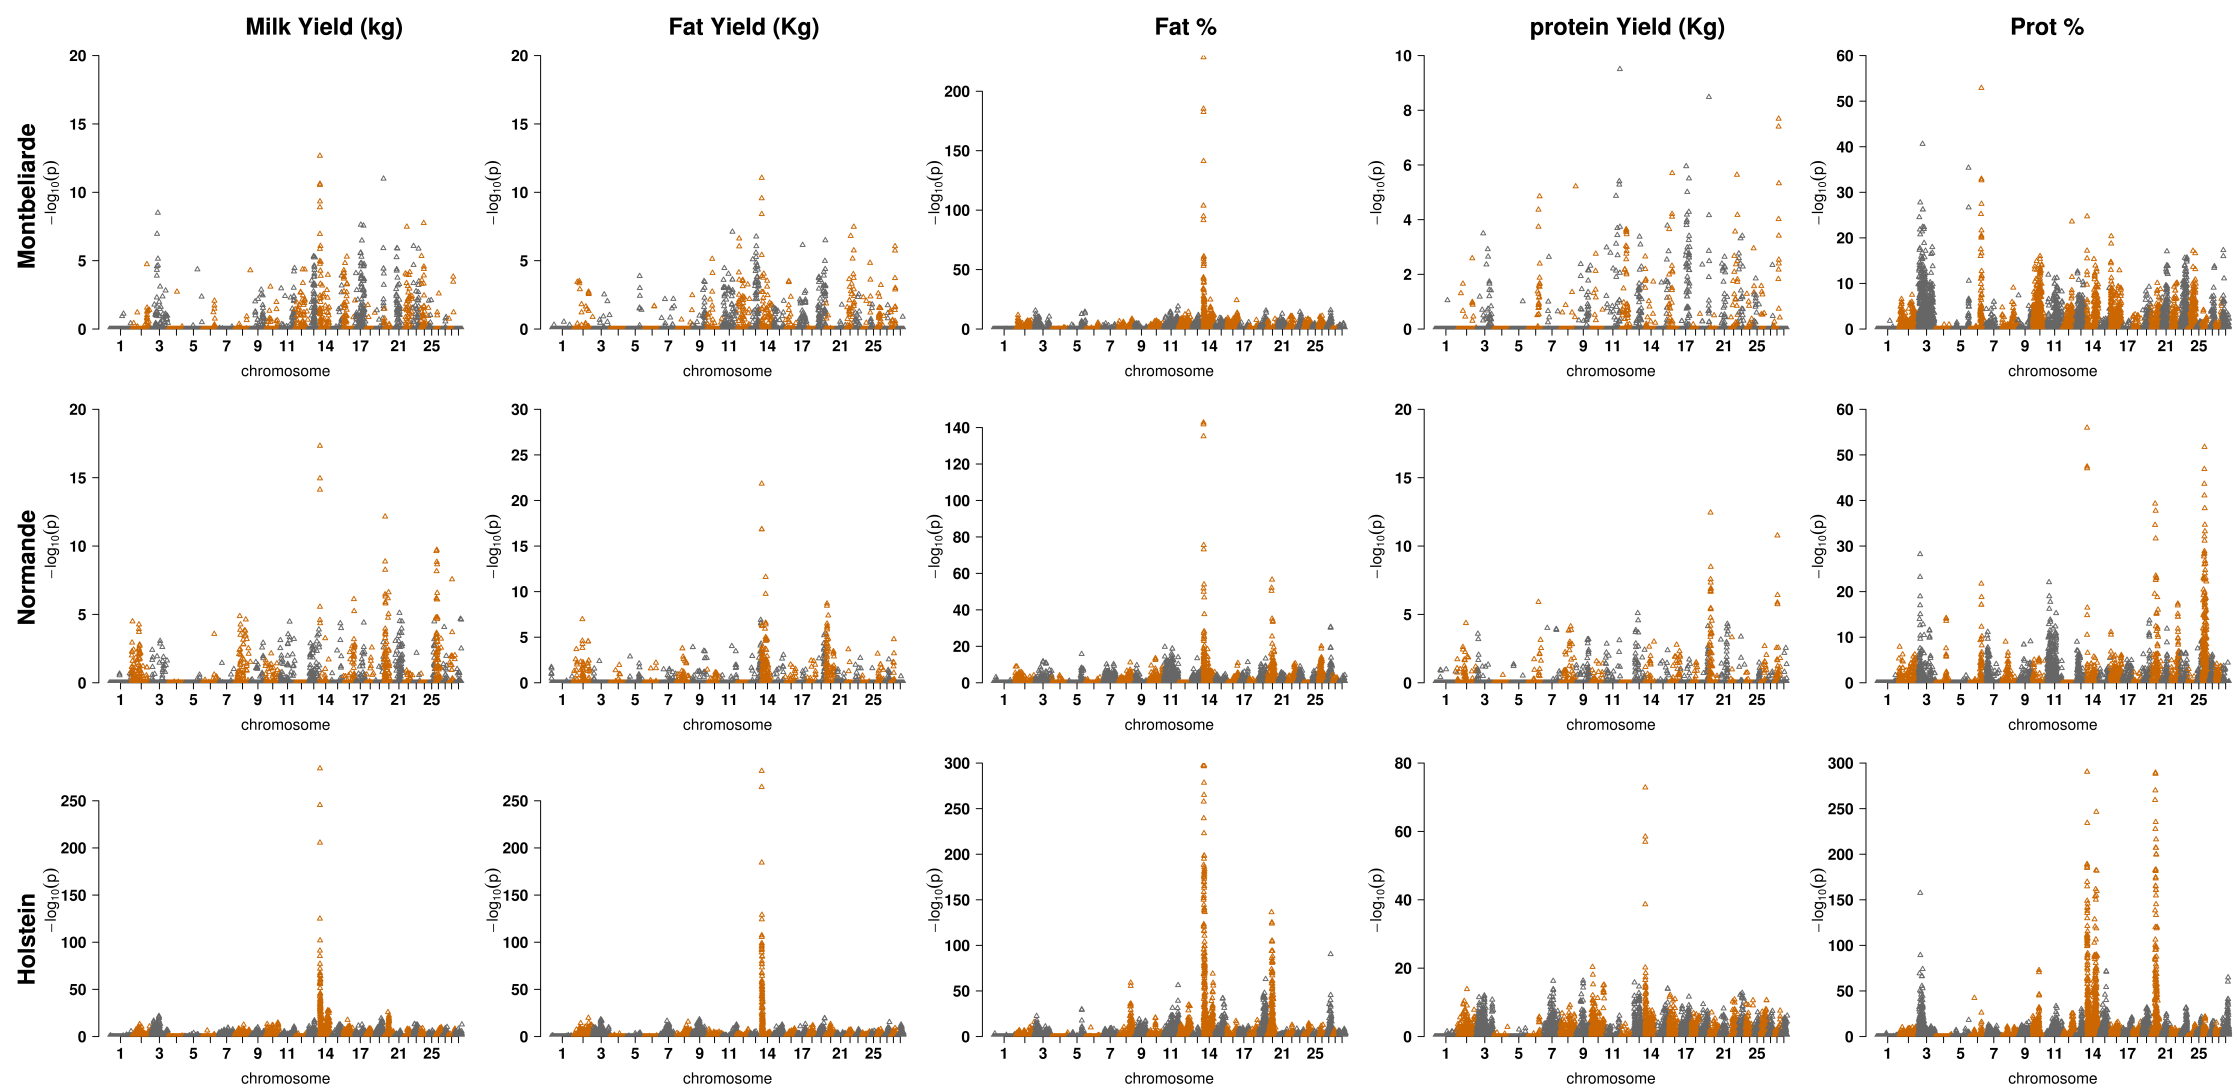

**Clinical mastitis**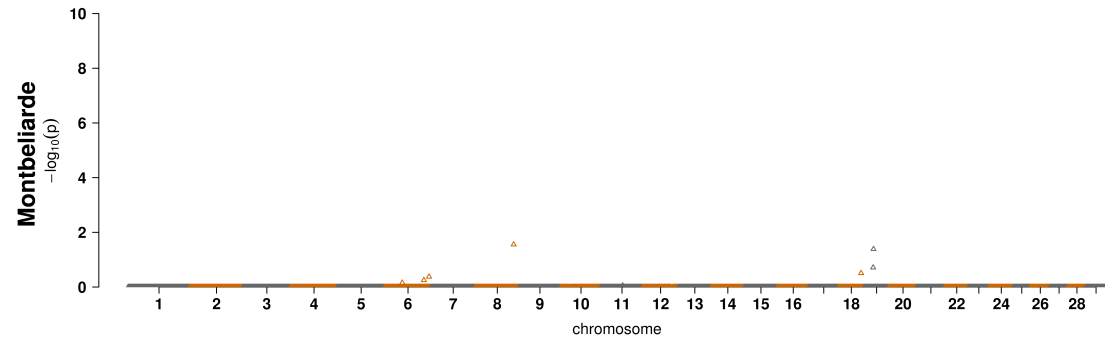**Somatic cell score**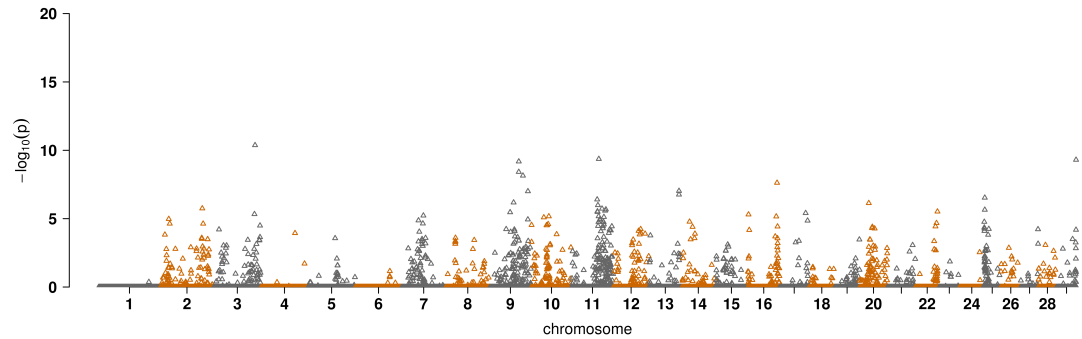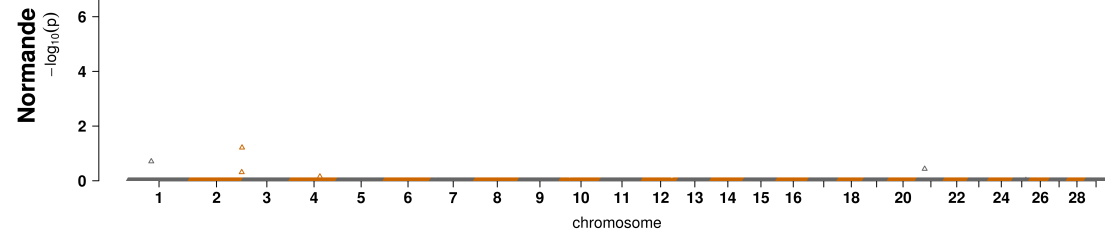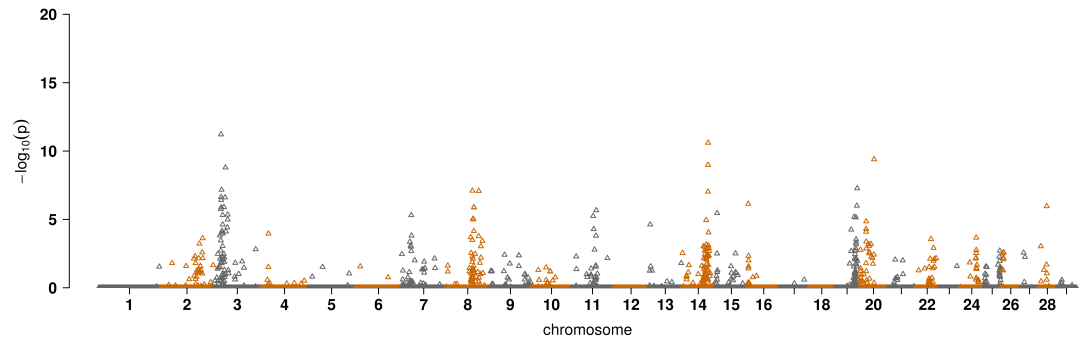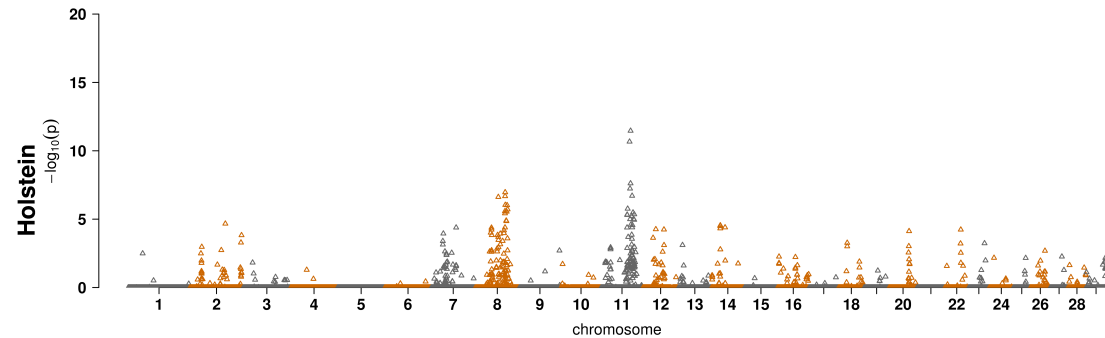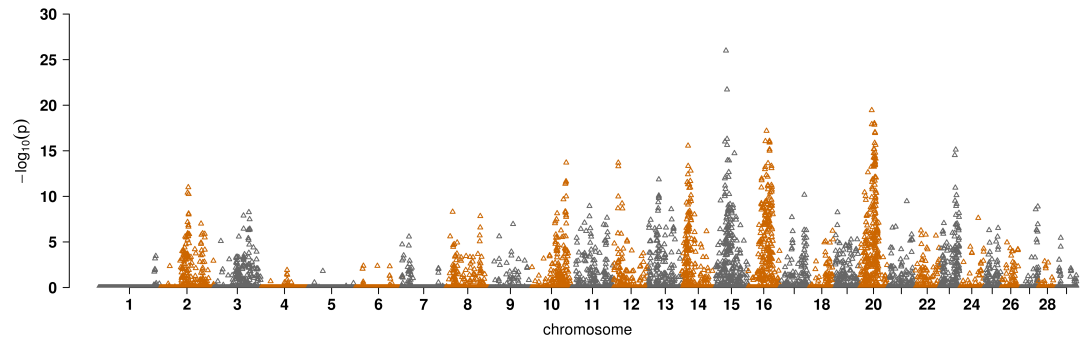**Manhattan plots for udder health traits in three French dairy breeds**
